# Supplementary material for: Computational analysis identifies a sponge interaction network between long non-coding RNAs and messenger RNAs in human breast cancer
Source: PubMed Central journal article supplement (PMC4113672; doi:10.1186/1752-0509-8-83), 2014-07-17

# Distribution of sensitivity correlation S

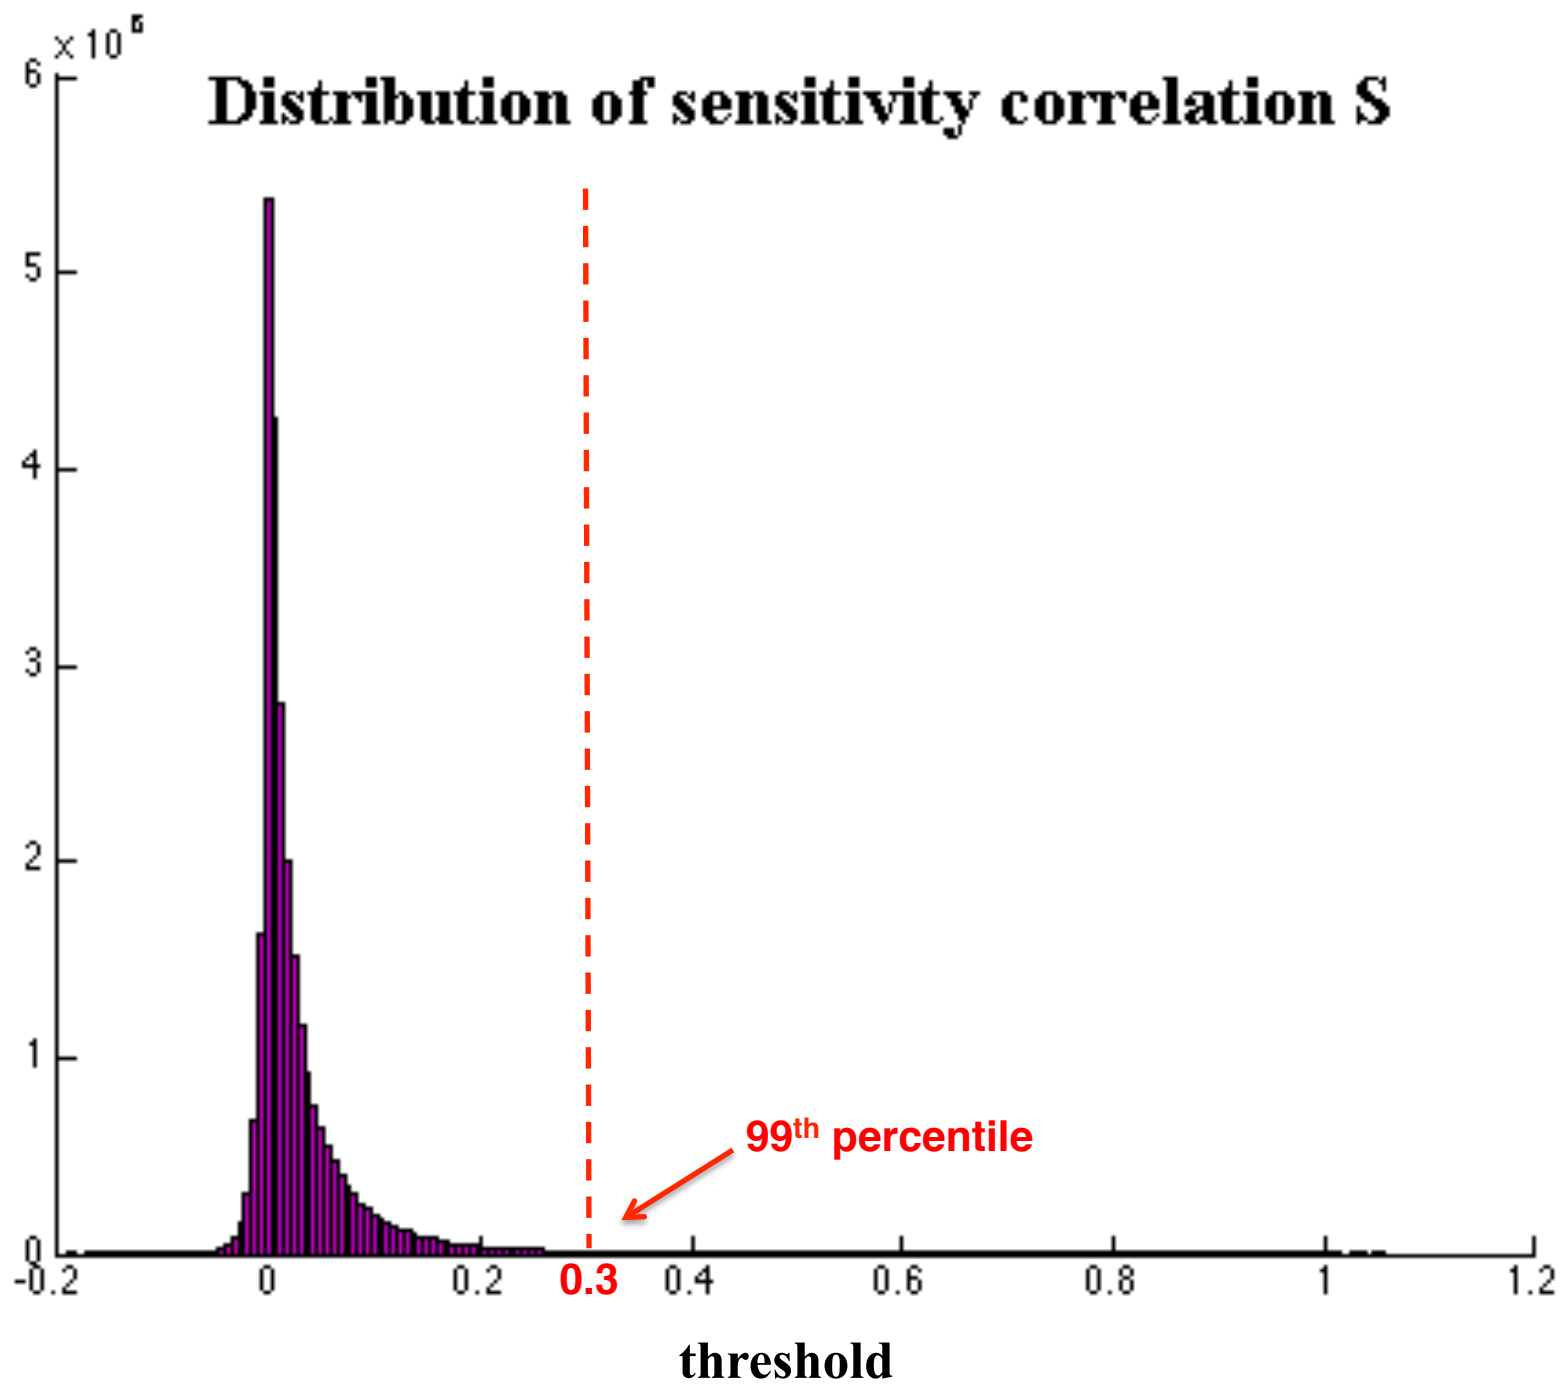

Supplement: 1752-0509-8-83-S16.pdf [file 1752-0509-8-83-S16.pdf]
